# Supplementary material for: Identifying models of HIV care and treatment service delivery in Tanzania, Uganda, and Zambia using cluster analysis and Delphi survey
Source: Springer Nature journal article supplement (doi:10.1186/s12913-017-2772-4), 2017-12-01
Supplement: MOESM1 [file 15284230]

Section 3 HIV Clinic (continued)

| 14. <i>Read aloud:</i> For the following questions, we are interested learning about the staffing of current services and whether there have been any changes in type of staffing since the start of this ART programme. Changes in staffing may take place formally with directions from the Ministry of Health or NGO/ clinic management, or it may take place informally based on the availability of personnel with skills and time at the clinic. Examples of a change in type of staffing include: doctor to nurse prescription of ART, or nurse to lay support worker for ART adherence. |                                                                                                                                                                                                               |                                                                                  |                                                             |                                                                                                  |                                                                         |                                                |                                                                           |                                                  |                                                                                 |                                                                                                                                                                                                                                                                                                                                                                                                                             |
|-------------------------------------------------------------------------------------------------------------------------------------------------------------------------------------------------------------------------------------------------------------------------------------------------------------------------------------------------------------------------------------------------------------------------------------------------------------------------------------------------------------------------------------------------------------------------------------------------|---------------------------------------------------------------------------------------------------------------------------------------------------------------------------------------------------------------|----------------------------------------------------------------------------------|-------------------------------------------------------------|--------------------------------------------------------------------------------------------------|-------------------------------------------------------------------------|------------------------------------------------|---------------------------------------------------------------------------|--------------------------------------------------|---------------------------------------------------------------------------------|-----------------------------------------------------------------------------------------------------------------------------------------------------------------------------------------------------------------------------------------------------------------------------------------------------------------------------------------------------------------------------------------------------------------------------|
|                                                                                                                                                                                                                                                                                                                                                                                                                                                                                                                                                                                                 |                                                                                                                                                                                                               | I                                                                                | II                                                          | III                                                                                              | IV                                                                      | V                                              | VI                                                                        | VII                                              | VIII                                                                            |                                                                                                                                                                                                                                                                                                                                                                                                                             |
|                                                                                                                                                                                                                                                                                                                                                                                                                                                                                                                                                                                                 | HIV Clinic Service                                                                                                                                                                                            | How many staff currently do <insert service> on a typical day at the HIV clinic? | Specify type of staff* are currently providing this service | Has there ever been a change in the type of staff providing this service, including lay workers? | If yes, specify type of staff* who has previously provided this service | What month and year did this change take place | Is there a document / standard operating procedure for this staff change? | Were staff trained before starting the new task? | Have staff received refresher training/ mentorship since starting the new task? | *Staff Type Categories (for columns II and IV)                                                                                                                                                                                                                                                                                                                                                                              |
| a.                                                                                                                                                                                                                                                                                                                                                                                                                                                                                                                                                                                              | Registration                                                                                                                                                                                                  |                                                                                  |                                                             | 00 No<br>01 Yes                                                                                  |                                                                         | ___/___<br>(M/Y)                               | 00 No<br>01 Yes                                                           | 00 No<br>01 Yes                                  | 00 No<br>01 Yes                                                                 | 01 Medical doctor/ officer<br>02 Clinical officer/ assistant<br>03 Nurse/ midwife (enrolled/ registered)<br>04 Lay ART support worker (non-medically trained, based primarily at the clinic, but not on the formal payroll)<br>05 Nutritionist<br>06 Social workers<br>07 Pharmacist<br>08 Pharmacy technician/ assistant<br>09 ART counsellor<br>10 Lab technician/ assistant<br>11 Data entry clerk<br>66 Other (specify) |
| b.                                                                                                                                                                                                                                                                                                                                                                                                                                                                                                                                                                                              | Triage (patient screening at entry to determine why the patient has come to the ART clinic and what services are needed to meet patient needs, i.e. critical symptoms requiring emergency care, routine care) |                                                                                  |                                                             | 00 No<br>01 Yes                                                                                  |                                                                         | ___/___<br>(M/Y)                               | 00 No<br>01 Yes                                                           | 00 No<br>01 Yes                                  | 00 No<br>01 Yes                                                                 |                                                                                                                                                                                                                                                                                                                                                                                                                             |
| c.                                                                                                                                                                                                                                                                                                                                                                                                                                                                                                                                                                                              | ART initial prescription (starting a patient on ART based upon assessment for ART eligibility)                                                                                                                |                                                                                  |                                                             | 00 No<br>01 Yes                                                                                  |                                                                         | ___/___<br>(M/Y)                               | 00 No<br>01 Yes                                                           | 00 No<br>01 Yes                                  | 00 No<br>01 Yes                                                                 |                                                                                                                                                                                                                                                                                                                                                                                                                             |

| 14. |                                                                                                                                                                                                                                                                                                                                                                                                           | I                                                                                | II                                                          | III                                                                                              | IV                                                                      | V                                              | VI                                                                        | VII                                              | VIII                                                                            |                                                                                                                                                                                                                                                                                                                                                                                                                             |
|-----|-----------------------------------------------------------------------------------------------------------------------------------------------------------------------------------------------------------------------------------------------------------------------------------------------------------------------------------------------------------------------------------------------------------|----------------------------------------------------------------------------------|-------------------------------------------------------------|--------------------------------------------------------------------------------------------------|-------------------------------------------------------------------------|------------------------------------------------|---------------------------------------------------------------------------|--------------------------------------------------|---------------------------------------------------------------------------------|-----------------------------------------------------------------------------------------------------------------------------------------------------------------------------------------------------------------------------------------------------------------------------------------------------------------------------------------------------------------------------------------------------------------------------|
|     | HIV Clinic Service                                                                                                                                                                                                                                                                                                                                                                                        | How many staff currently do <insert service> on a typical day at the HIV clinic? | Specify type of staff* are currently providing this service | Has there ever been a change in the type of staff providing this service, including lay workers? | If yes, specify type of staff* who has previously provided this service | What month and year did this change take place | Is there a document / standard operating procedure for this staff change? | Were staff trained before starting the new task? | Have staff received refresher training/ mentorship since starting the new task? | *Staff Type Categories (for columns II and IV)                                                                                                                                                                                                                                                                                                                                                                              |
| d.  | ART monitoring and management (ongoing assessment of patient's response to ART, including diagnosis and management of any drug side effects; clinical (emergence of new OIs), immunological (CD4 count), and if available, virological (viral load count) monitoring to determine if ARV regimen is efficacious; and diagnosis and management of drug resistance (switch to 2 <sup>nd</sup> line regimen) |                                                                                  |                                                             | 00 No<br>01 Yes                                                                                  |                                                                         | ___/___<br>(M/Y)                               | 00 No<br>01 Yes                                                           | 00 No<br>01 Yes                                  | 00 No<br>01 Yes                                                                 | 01 Medical doctor/ officer<br>02 Clinical officer/ assistant<br>03 Nurse/ midwife (enrolled/ registered)<br>04 Lay ART support worker (non-medically trained, based primarily at the clinic, but not on the formal payroll)<br>05 Nutritionist<br>06 Social workers<br>07 Pharmacist<br>08 Pharmacy technician/ assistant<br>09 ART counsellor<br>10 Lab technician/ assistant<br>11 Data entry clerk<br>66 Other (specify) |
| e.  | Clinical services (diagnosis and management of OIs, provision of Cotrimoxazole prophylaxis, and management of non-HIV conditions, i.e. malaria, broken bones)                                                                                                                                                                                                                                             |                                                                                  |                                                             | 00 No<br>01 Yes                                                                                  |                                                                         | ___/___<br>(M/Y)                               | 00 No<br>01 Yes                                                           | 00 No<br>01 Yes                                  | 00 No<br>01 Yes                                                                 |                                                                                                                                                                                                                                                                                                                                                                                                                             |

| 14. | HIV Clinic Service                              | I<br>How many staff currently do <insert service> on a typical day at the HIV clinic? | II<br>Specify type of staff* are currently providing this service | III<br>Has there ever been a change in the type of staff providing this service, including lay workers? | IV<br>If yes, specify type of staff* who has previously provided this service | V<br>What month and year did this change take place | VI<br>Is there a document / standard operating procedure for this staff change? | VII<br>Were staff trained before starting the new task? | VIII<br>Have staff received refresher training/ mentorship since starting the new task? | *Staff Type Categories (for columns II and IV)                                                                                                                                                                                                                                                                                                                                                                              |
|-----|-------------------------------------------------|---------------------------------------------------------------------------------------|-------------------------------------------------------------------|---------------------------------------------------------------------------------------------------------|-------------------------------------------------------------------------------|-----------------------------------------------------|---------------------------------------------------------------------------------|---------------------------------------------------------|-----------------------------------------------------------------------------------------|-----------------------------------------------------------------------------------------------------------------------------------------------------------------------------------------------------------------------------------------------------------------------------------------------------------------------------------------------------------------------------------------------------------------------------|
| f.  | Referral services                               |                                                                                       |                                                                   | 00 No<br>01 Yes                                                                                         |                                                                               | ___/___<br>(M/Y)                                    | 00 No<br>01 Yes                                                                 | 00 No<br>01 Yes                                         | 00 No<br>01 Yes                                                                         | 01 Medical doctor/ officer<br>02 Clinical officer/ assistant<br>03 Nurse/ midwife (enrolled/ registered)<br>04 Lay ART support worker (non-medically trained, based primarily at the clinic, but not on the formal payroll)<br>05 Nutritionist<br>06 Social workers<br>07 Pharmacist<br>08 Pharmacy technician/ assistant<br>09 ART counsellor<br>10 Lab technician/ assistant<br>11 Data entry clerk<br>66 Other (specify) |
| g.  | ART dispensing at the HIV clinic                |                                                                                       |                                                                   | 00 No<br>01 Yes                                                                                         |                                                                               | ___/___<br>(M/Y)                                    | 00 No<br>01 Yes                                                                 | 00 No<br>01 Yes                                         | 00 No<br>01 Yes                                                                         |                                                                                                                                                                                                                                                                                                                                                                                                                             |
| h.  | ARV drug adherence counselling                  |                                                                                       |                                                                   | 00 No<br>01 Yes                                                                                         |                                                                               | ___/___<br>(M/Y)                                    | 00 No<br>01 Yes                                                                 | 00 No<br>01 Yes                                         | 00 No<br>01 Yes                                                                         |                                                                                                                                                                                                                                                                                                                                                                                                                             |
| i.  | Phlebotomy                                      |                                                                                       |                                                                   | 00 No<br>01 Yes                                                                                         |                                                                               | ___/___<br>(M/Y)                                    | 00 No<br>01 Yes                                                                 | 00 No<br>01 Yes                                         | 00 No<br>01 Yes                                                                         |                                                                                                                                                                                                                                                                                                                                                                                                                             |
| j.  | Follow-up on missed appointments and defaulters |                                                                                       |                                                                   | 00 No<br>01 Yes                                                                                         |                                                                               | ___/___<br>(M/Y)                                    | 00 No<br>01 Yes                                                                 | 00 No<br>01 Yes                                         | 00 No<br>01 Yes                                                                         |                                                                                                                                                                                                                                                                                                                                                                                                                             |
| k.  | Medical records management                      |                                                                                       |                                                                   | 00 No<br>01 Yes                                                                                         |                                                                               | ___/___<br>(M/Y)                                    | 00 No<br>01 Yes                                                                 | 00 No<br>01 Yes                                         | 00 No<br>01 Yes                                                                         |                                                                                                                                                                                                                                                                                                                                                                                                                             |
| l.  | Any other? (Specify)                            |                                                                                       |                                                                   | 00 No<br>01 Yes                                                                                         |                                                                               | ___/___<br>(M/Y)                                    | 00 No<br>01 Yes                                                                 | 00 No<br>01 Yes                                         | 00 No<br>01 Yes                                                                         |                                                                                                                                                                                                                                                                                                                                                                                                                             |
